# Supplementary material for: Bifunctional scaffolds of hydroxyapatite/poly(dopamine)/carboxymethyl chitosan with osteogenesis and anti-osteosarcoma effect
Source: Royal Society of Chemistry journal article supplement (doi:10.1039/d0bm01785j), 2021-01-01
Supplement: d0bm01785j1.pdf [file d0bm01785j1.pdf]

### Support information

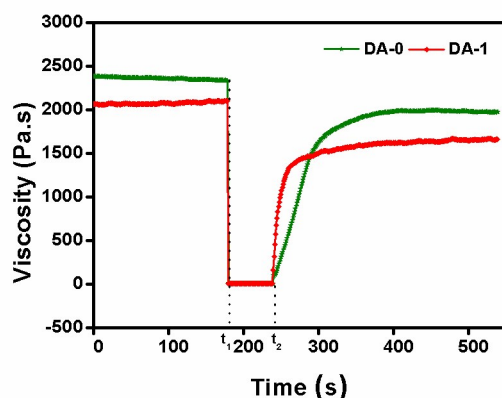

Figure S1 Tactile curve of the slurry of DA-0 and DA-1 group

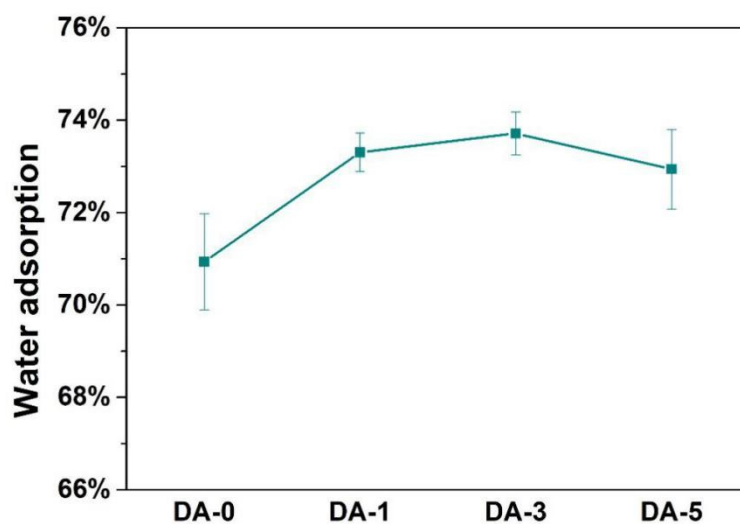

Figure S2 Effect of PDA content on water absorption

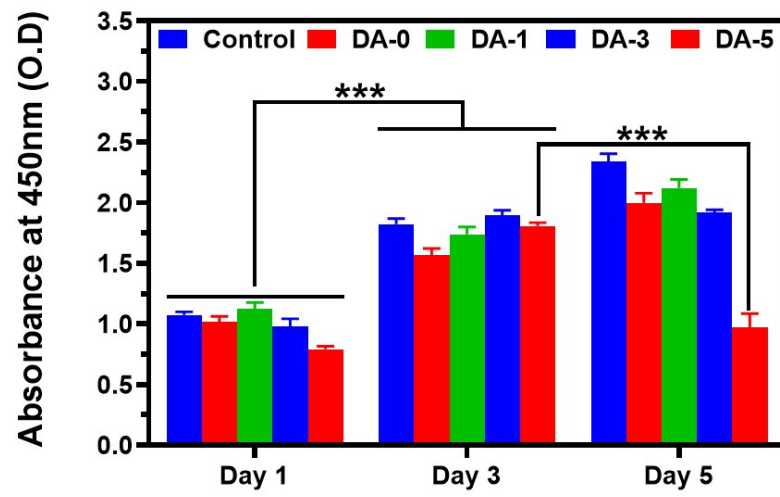

Figure S3 CCK8 measurement of mBMSCs on the scaffolds with different PDA content (\*\*\*p < 0.001, n=6)
